# Supplementary material for: Isolation, purification, and full NMR assignments of cyclopamine from Veratrum californicum
Source: PubMed Central journal article supplement (PMC2442831; doi:10.1186/1752-153x-2-12), 2008-06-24

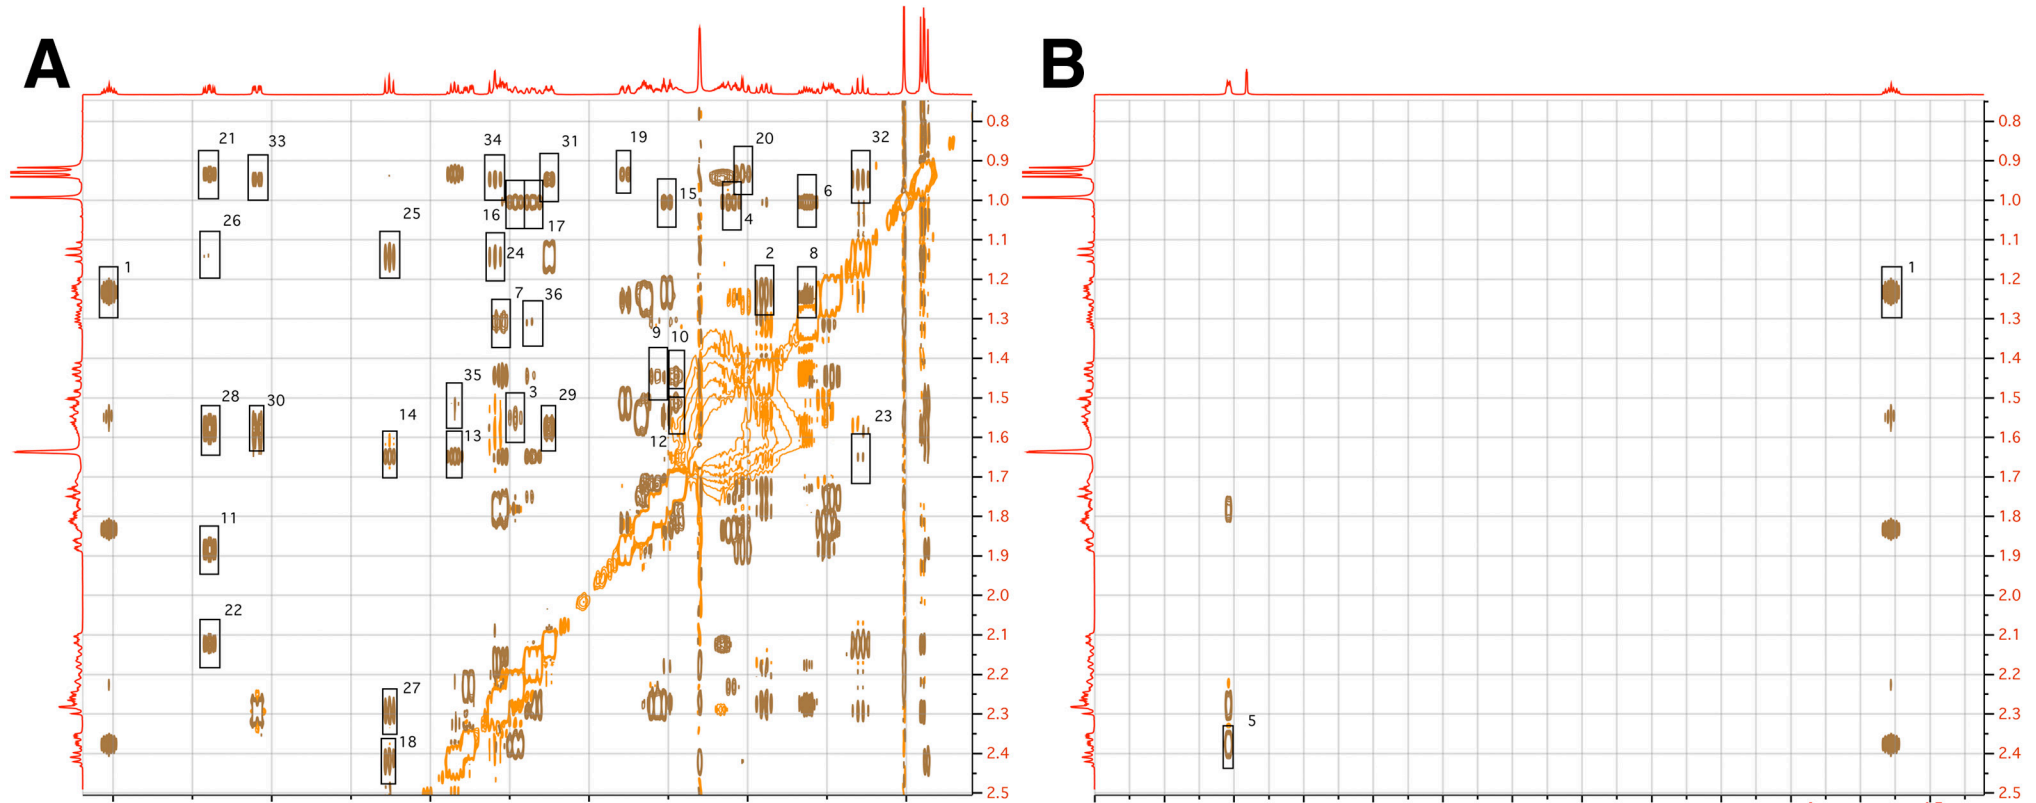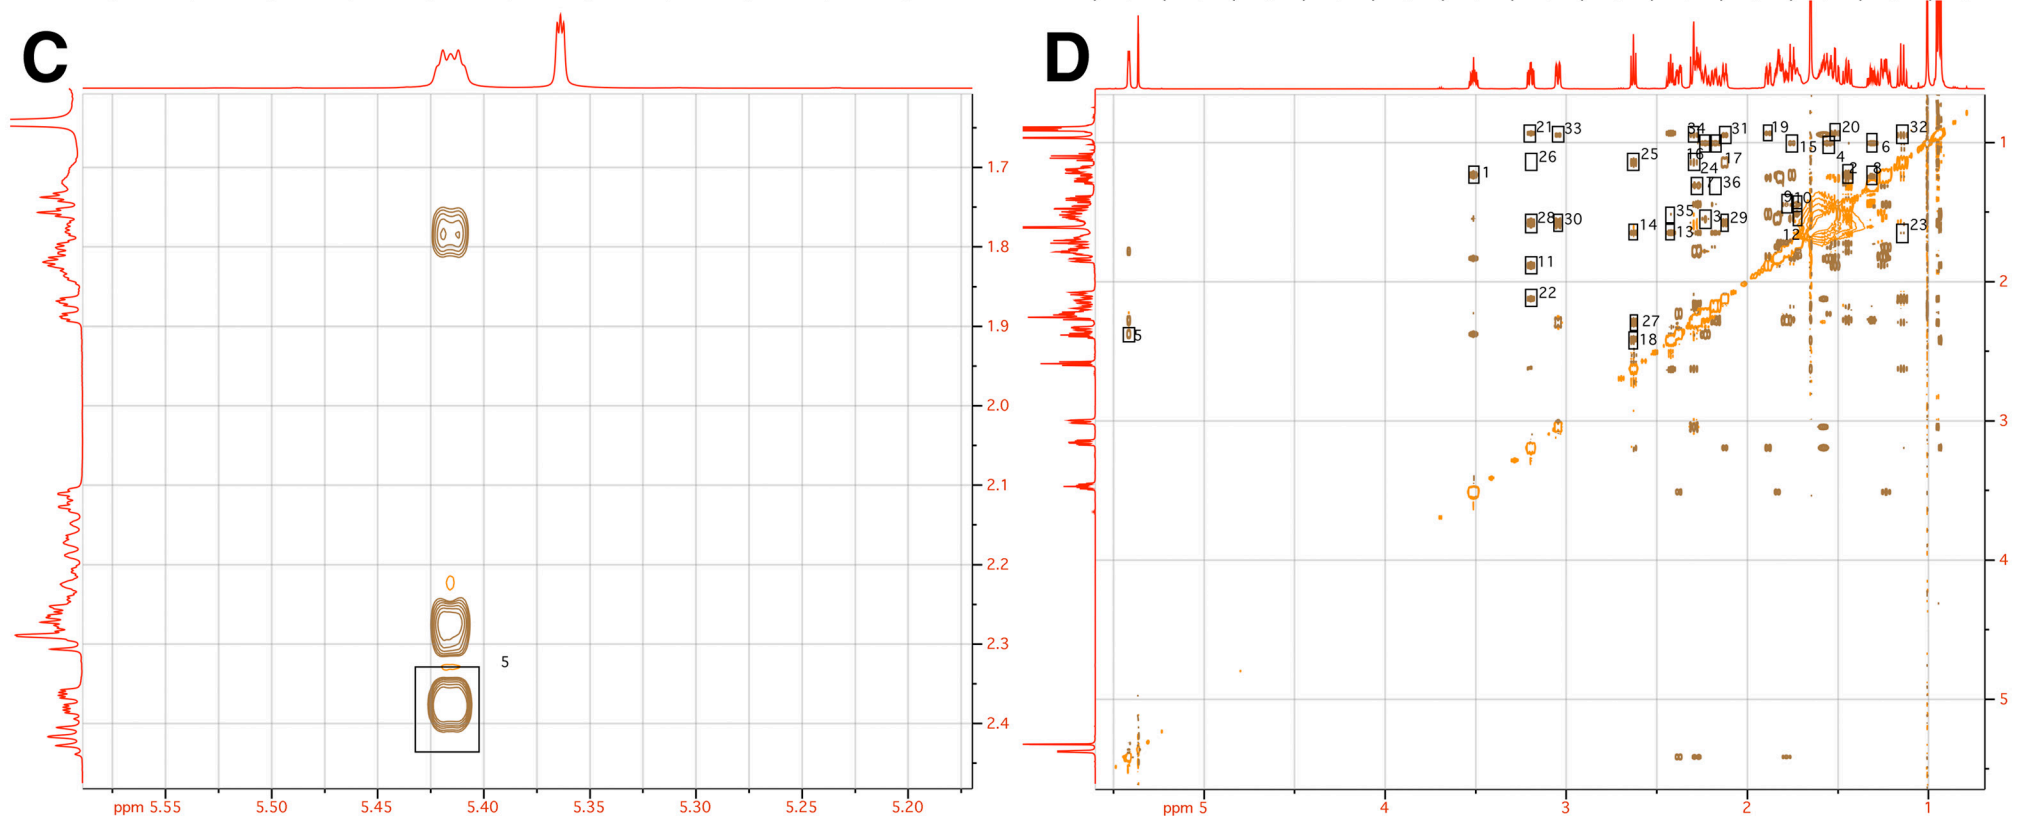

Supplement: 1752-153X-2-12-S3.pdf [file 1752-153X-2-12-S3.pdf]
